# Supplementary material
Source: PubMed Central journal article supplement (PMC5110118)
Supplement: NIHMS736297-supplement-Supplemental_Info.pdf [file NIHMS736297-supplement-Supplemental_Info.pdf]

## Supporting Information

# Self-Assembling NanoLuc Luciferase Fragments as Probes for Protein Aggregation in Living Cells

Jia Zhao, Travis J. Nelson, Quyen Vu, Tiffany Truong, and Cliff I. Stains\*

*Department of Chemistry, University of Nebraska – Lincoln, Lincoln, NE 68588 (USA)*

\*E-mail: cstains2@unl.edu

### Contents

|                                                                                                               |    |
|---------------------------------------------------------------------------------------------------------------|----|
| 1. Stock Solutions .....                                                                                      | 2  |
| 2. Identification of Potential Nluc Fragmentation Sites .....                                                 | 2  |
| 3. Cloning of Nluc Fragments .....                                                                            | 2  |
| 4. Cloning of Amyloid-Beta-, GFP-, and MBP-N65 Fusions .....                                                  | 3  |
| 5. Preparation of Extracts Containing Total Protein or Soluble Protein Fractions of Amyloid-Beta Mutants..... | 3  |
| 6. Western Blotting Conditions. ....                                                                          | 4  |
| 7. Cloning of Mammalian Cell Expression Constructs.....                                                       | 4  |
| 8. Supplementary Figures.....                                                                                 | 5  |
| Figure S1 .....                                                                                               | 5  |
| Figure S2.....                                                                                                | 6  |
| Figure S3.....                                                                                                | 7  |
| Figure S4.....                                                                                                | 8  |
| Figure S5.....                                                                                                | 9  |
| Figure S6.....                                                                                                | 10 |
| Figure S7.....                                                                                                | 11 |
| Figure S8.....                                                                                                | 12 |
| Figure S9.....                                                                                                | 13 |
| 9. Supplementary Tables.....                                                                                  | 14 |
| Table S1 .....                                                                                                | 14 |
| Table S2 .....                                                                                                | 15 |
| Table S3 .....                                                                                                | 16 |
| 10. References.....                                                                                           | 17 |

## 1. Stock Solutions

1x phosphate buffered saline (1x PBS): 137 mM NaCl, 2 mM KH<sub>2</sub>PO<sub>4</sub>, 7.9 mM Na<sub>2</sub>HPO<sub>4</sub>, 2.7 mM KCl, pH = 7.4. 2 mM 2-mercaptoethanol was added to the buffer prior to use.

2x Nluc assay buffer<sup>1</sup>: 100 mM MES pH = 6.0, 1 mM EDTA, 150 mM KCl, 2 mM 2-mercaptoethanol, and 35 mM thiourea. This stock buffer was diluted with nanopure water to obtain 1x Nluc assay buffer.

Coelenterazine working stock: Coelenterazine was dissolved in acidified ethanol and diluted to 50 μM using 1x Nluc assay buffer.

Ampicillin stock solution: 1 g ampicillin was dissolved into 10 mL of nanopure water to yield 100 mg/ml stock solution (1000x). The solution was filtered through a 0.2 μm sterile syringe filter, aliquoted, and stored at -20 °C.

Kanamycin stock solution: 0.5 g kanamycin was combined with 10 mL of nanopure water to yield a 50 mg/ml stock solution (1000x). The resulting solution was filtered through a 0.2 μm sterile syringe filter, aliquoted, and stored at -20 °C.

TBST solution (10x): 200 mM Tris-HCl pH = 7.5, 1.5 M NaCl, and 1% Tween-20. Diluted to 1x TBST using nanopure water.

## 2. Identification of Potential Nluc Fragmentation Sites

In order to identify potential fragmentation sites in Nluc, we obtained Kyte values<sup>2</sup> for the Nluc amino acid sequence. In addition, the secondary structure of Nluc was predicted using PSIPRED.<sup>3</sup> Combining the information obtained from both these analyses, we selected 5 sites located at predicted hydrophilic loop regions and studied the activity of the corresponding fragmented pairs. The amino acid residue numbering of these fragmentation sites is given below.

| Nluc Fragmentation Sites |                                  |                                  |
|--------------------------|----------------------------------|----------------------------------|
|                          | N-Terminal Fragment <sup>a</sup> | C-Terminal Fragment <sup>a</sup> |
| <b>N65/66C</b>           | 1-65                             | 66-171                           |
| <b>N76/77C</b>           | 1-76                             | 77-171                           |
| <b>N87/88C</b>           | 1-87                             | 88-171                           |
| <b>N116/117C</b>         | 1-116                            | 117-171                          |
| <b>N137/138C</b>         | 1-137                            | 138-171                          |

<sup>a</sup>Numbering indicates amino acid residue.

## 3. Cloning of Nluc Fragments

DNA sequences encoding N-terminal fragments of Nluc<sup>1</sup> were amplified using primers containing 5' SacI and 3' HindIII restriction sites for incorporation into the pET-45b vector (Novagen). Similarly, DNA sequences corresponding to C-terminal Nluc fragments were amplified and incorporated into the pRSF-1b vector (Novagen) using NcoI and PstI restriction sites. Primers also encoded an amino-terminal hexahistidine tag for the N-terminal fragments. PCR amplified N-terminal Nluc fragments were digested with SacI and HindIII, and ligated to SacI/HindIII digested and calf intestinal phosphatase (CIP)-treated pET-45b. The ligation

mixture was transformed into XL1-Blue competent cells (Stratagene) and grown on ampicillin plates. Plasmid DNA was isolated from selected colonies and confirmed by DNA sequencing. In the same fashion, the PCR amplified C-terminal Nluc fragments were digested with NcoI and PstI, and ligated to NcoI/PstI digested and CIP-treated pRSF-1b. The ligation mixture was transformed into XL1-Blue competent cells, grown on kanamycin plates, and positive clones were confirmed by DNA sequencing.

#### **4. Cloning of Amyloid-Beta-, GFP-, and MBP-N65 Fusions**

DNA sequences encoding the maltose binding protein (MBP) were amplified using primers containing 5' BamHI and 3' XmaI restriction sites for incorporation into the pETNluc N65 vector. Amyloid-beta and GFP sequences were incorporated into the pETNluc N65 vector via 5' BamHI and 3' BglII restriction sites. The resulting N-terminal N65 fusion proteins had an N-terminal hexahistidine tag and a GGGSSGGG linker between the fusion protein and N65. Amyloid-beta mutants<sup>4</sup> were generated using site-directed mutagenesis (QuikChange Lightning Multi Site-Directed Mutagenesis Kit, Agilent) using wild-type amyloid-beta as a template, according to manufacturer protocols.

#### **5. Preparation of Extracts Containing Total Protein or Soluble Protein Fractions of Amyloid-Beta Mutants**

BL21-Gold (DE3) cells were cotransformed with vectors containing N-terminal fusions of wild-type amyloid-beta or the indicated amyloid-beta mutants fused to N65 along with a vector expressing 66C. Single colonies were used to inoculate 6 mL of TB media containing ampicillin and kanamycin. Cultures were grown to an  $OD_{600} = 0.6 - 0.8$  at 37 °C, with shaking at 250 rpm. Cultures were then cooled to 16 °C, and the cells were induced with 0.2 mM IPTG and grown overnight. The next morning, an amount of cells equal to an  $OD_{600} = 3.0$  in 1 mL was harvested by centrifugation at 17,000g for 10 min and resuspended in 200  $\mu$ L of 8 M urea and 200  $\mu$ L of 10% SDS. The cell samples were heated at 100 °C for 10 minutes, centrifuged for 15 minutes at 17,000g, and lysates were incubated with 10  $\mu$ L HisPur Ni-NTA resin at 4 °C with rotation for an hour. The resin was collected by centrifugation at 500g for 10 min and washed with 200  $\mu$ L of 1x PBS containing 10 mM imidazole and 8 M urea. Proteins were eluted by adding 10  $\mu$ L of 1x PBS containing 1 M imidazole and 8 M urea followed by immediate addition of 10  $\mu$ L of SDS-PAGE loading dye solution. After heating at 100 °C for 10 minutes, the samples were centrifuged for 15 minutes at 17,000g. The resulting supernatants (2.5  $\mu$ L), which represent the total expression levels of N65 fusions and 66C, were loaded onto a 12% polyacrylamide gel and analyzed by Western blotting.

For isolation of proteins in the soluble fraction, cells were induced using the protocol described above and normalized to an  $OD_{600} = 3.0$  in 1 mL. Cells were lysed, according to the vendor provided protocol, with 200  $\mu$ L of B-PER reagent. The resulting soluble fractions were incubated with 10  $\mu$ L of HisPur Ni-NTA resin, as described above except that urea was not included during the washing or elution steps. Soluble proteins (10  $\mu$ L) were loaded onto a 12% polyacrylamide gel and analyzed by Western blotting.

## **6. Western Blotting Conditions.**

Cell samples were normalized to an  $OD_{600} = 3.0$  in 1 mL. Cells were harvested by centrifugation at 17,000g for 10 min at 4 °C and were lysed using the B-PER Bacterial Protein Extraction Reagent (100  $\mu$ L). Lysates were clarified by centrifugation and incubated with 10  $\mu$ L Ni-NTA resin for 1 hr at 4 °C with rotation. Ni-NTA resin was then collected via centrifugation at 800g for 5 min and washed with increasing concentrations of imidazole in 1x PBS (100  $\mu$ L of 10 mM imidazole followed by 100  $\mu$ L of 50 mM imidazole). Resin was resuspended in 5  $\mu$ L 500 mM imidazole and 5  $\mu$ L SDS-PAGE loading dye. After denaturing at 95 °C for 10 minutes, the samples were centrifuged at 17,000g for 5 min and cooled to room temperature before loading on a 12% SDS-PAGE gel. Samples were transferred from the SDS-PAGE gel to a nitrocellulose membrane using standard protocols. The membrane was blocked with 5% milk in 1x TBST for 1 hr at room temperature. The membrane was washed three times with 1x TBST (15 minutes per wash), before incubating with a 1:10,000 dilution of anti-6X His-tag antibody conjugated to HRP (Abcam, ab1187) in 1x TBST containing 5% milk overnight at 4 °C with rotation. The next morning, the membrane was washed three times with 1x TBST (1 hr for the first wash, and 15 min for the second and third wash). Bands were visualized using the SuperSignal West Dura Extended Duration Substrate (Life Technologies, 34075) on a Gel Doc XR+ system.

## **7. Cloning of Mammalian Cell Expression Constructs.**

DNA sequences encoding N-terminal fragments of Nluc were amplified and ligated into the mVenus C1 vector (Addgene, 27794). Similarly, DNA sequences corresponding to C-terminal Nluc fragments were amplified and ligated into the mCerulean N1 vector (Addgene, 27795). Fusion proteins were amplified and ligated into the mVenus C1 vector containing the N65 Nluc fragment.

## 8. Supplementary Figures

### Figure S1

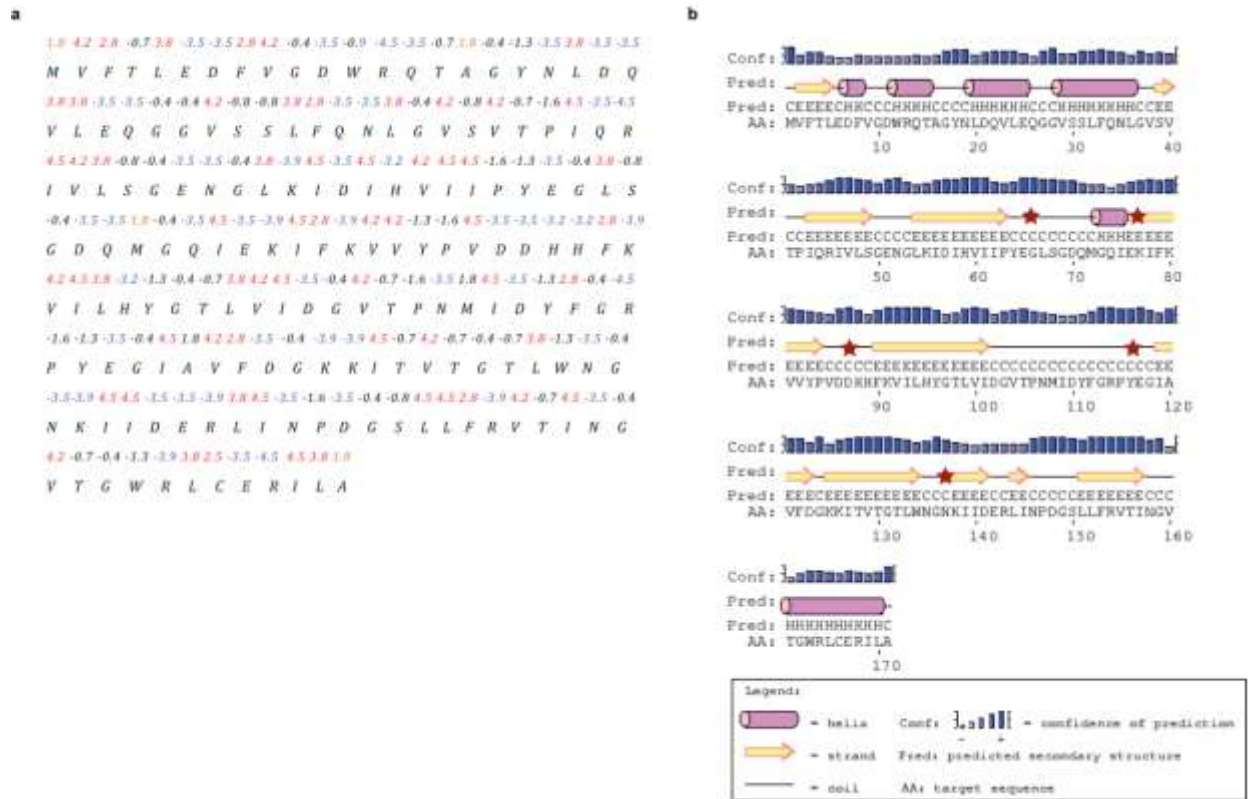

Identification of potential Nluc fragmentation sites. (a) Kyte values<sup>2</sup> for the Nluc amino acid sequence. Red values indicate hydrophobic residues while blue values indicate hydrophilic residues. (b) The predicted secondary structure of Nluc obtained using PSIPRED.<sup>3</sup> Red stars indicate sites chosen for fragmentation.

**Figure S2**

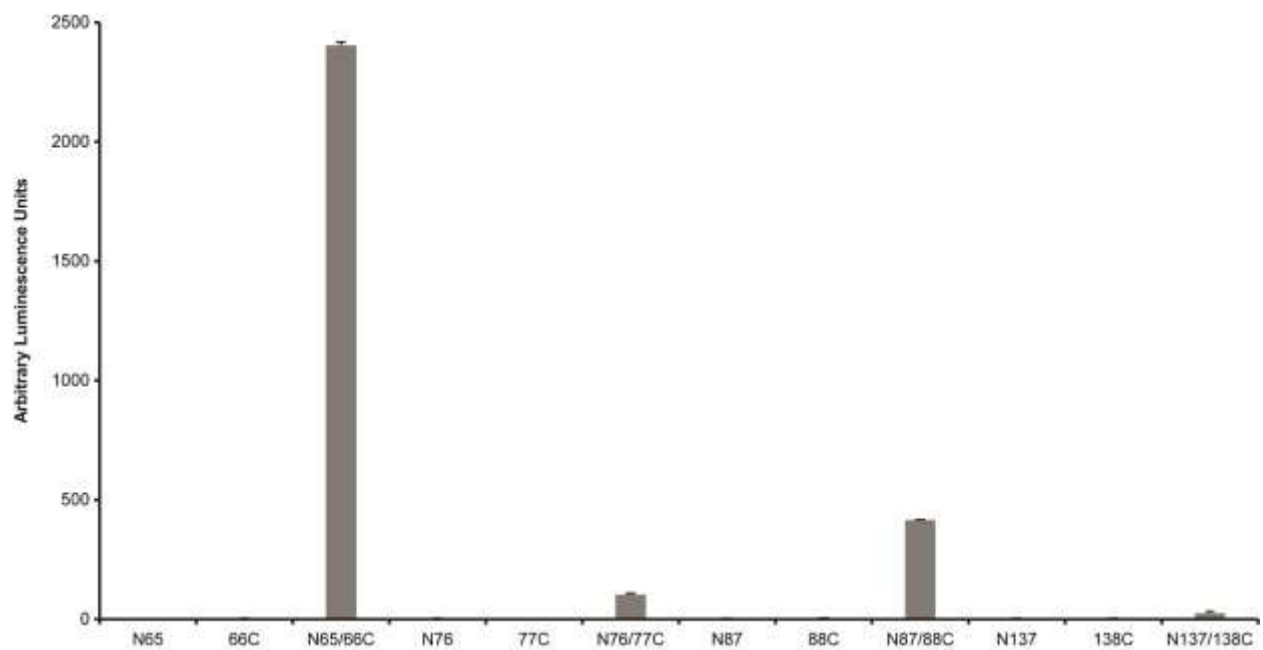

Luminescence intensity from bacterial lysates containing the indicated Nluc fragment. Individual lysates are mixed where indicated. Lysates were normalized for cell density and error bars represent the standard deviation of triplicate experiments.

**Figure S3**

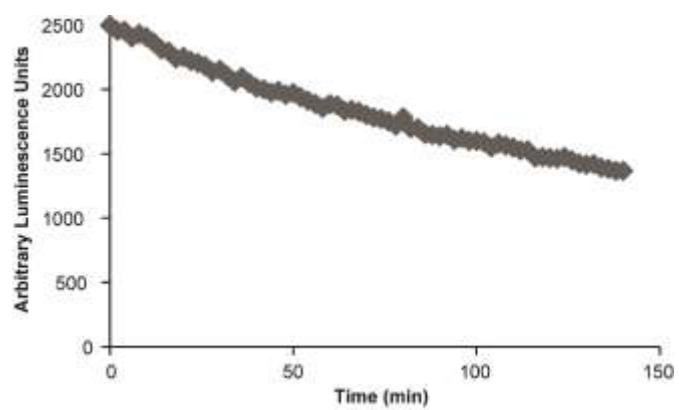

Luminescence signal of the N65/66C lysate mixture from Figure S2 monitored over time.

**Figure S4**

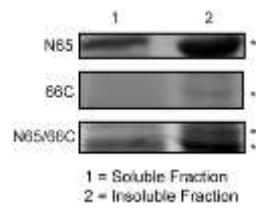

Coomassie stained gels of soluble and insoluble protein fractions from N65 (10.3 kDa) and 66C (13.5 kDa) expressed alone or together. Coexpression leads to an increase in the total expression of 66C. Bands corresponding to the molecular weight of N65 and 66C are indicated by an asterisk.



**Figure S5**

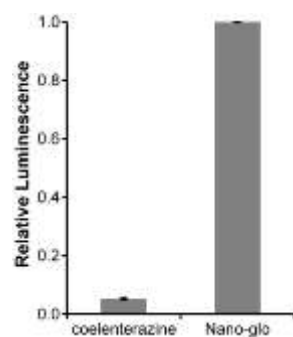

Reassembled Nluc (500 nM each fragment) can utilize either coelenterazine (25  $\mu$ M) or furimazine as a substrate. Furimazine was added using the Nano-glo substrate (0.25  $\mu$ L) from Promega. Comparisons of the intensities between coelenterazine and Nano-glo should not be made, as the concentration of furimazine in the commercially available Nano-glo formulation is unknown.

**Figure S6**

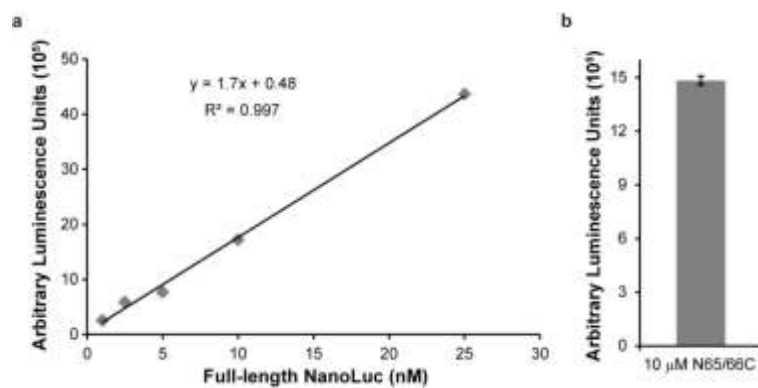

Reassembly efficiency compared to full-length NanoLuc. (a) Luminescence obtained from full-length NanoLuc at varying concentrations in the presence of coelenterazine (25 μM). (b) The luminescence intensity of reassembled N65 (10 μM) and 66C (10 μM) is shown for comparison.

**Figure S7**

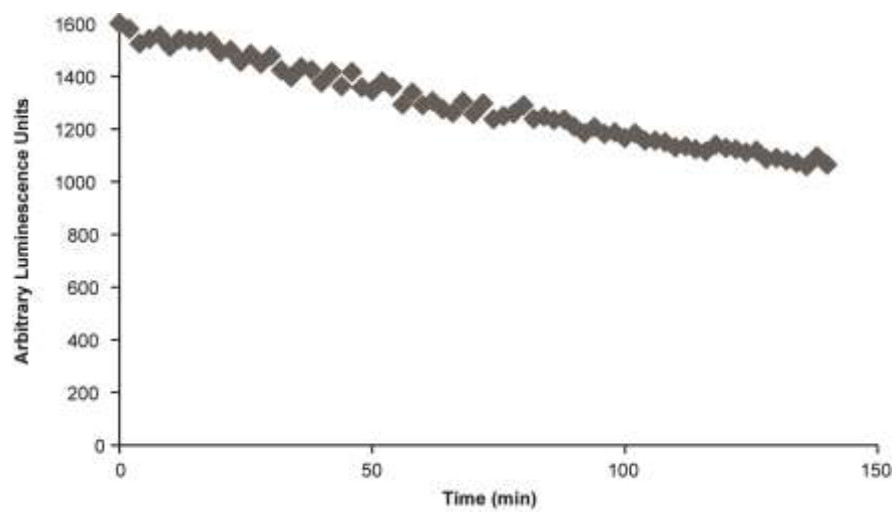

Luminescence signal of a mixture of purified N65 (10  $\mu$ M) and 66C (50 nM) over time.

**Figure S8**

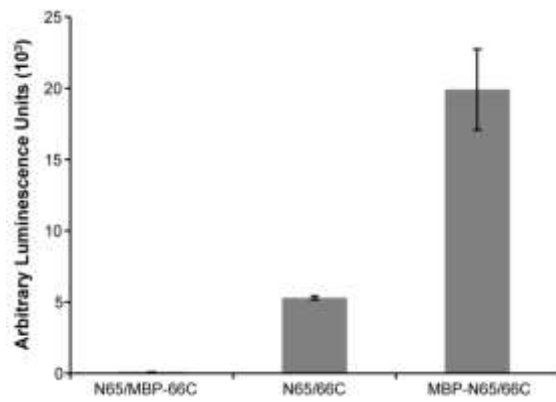

Bacterial luminescence of an N-terminal fusion of MBP to 66C (MBP-66C). Dramatically reduced luminescence is observed compared to an N-terminal fusion of MBP to N65 (MBP-N65).

## Figure S9

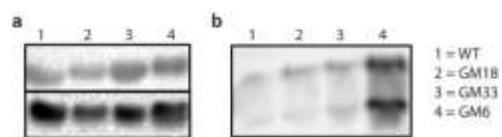

(a) Total expression of N65 fusions (top) and 66C (bottom) does not change based on the identity of the A $\beta$  mutant. (b) The amount of soluble N65 fusion (top) and 66C (bottom) changes according to the known aggregation potential of the appended A $\beta$  mutant.<sup>4</sup> The changes in the relative amount of soluble protein correlate to the luminescence intensities observed in Figure 5a. Procedures for the preparation of samples containing total as well as soluble A $\beta$  mutants are given in the Supporting Information.

## 9. Supplementary Tables

**Table S1: Amino Acid Sequences for Nluc Fragment Constructs**

| Protein | Amino acid sequence                                                                                                                                                         |
|---------|-----------------------------------------------------------------------------------------------------------------------------------------------------------------------------|
| N65     | MAHHHHHHVGTGSNDDDDKSPDPNWELMVFTLEDFVGDWRQTAGYNLDQVLEQGGVSSLFQNLGVSVTPIQRIVLSG<br>ENGLKIDIHVIIPYE                                                                            |
| N76     | MAHHHHHHVGTGSNDDDDKSPDPNWELMVFTLEDFVGDWRQTAGYNLDQVLEQGGVSSLFQNLGVSVTPIQRIVLSG<br>ENGLKIDIHVIIPYEGLSGDQMGQIE                                                                 |
| N87     | MAHHHHHHVGTGSNDDDDKSPDPNWELMVFTLEDFVGDWRQTAGYNLDQVLEQGGVSSLFQNLGVSVTPIQRIVLSG<br>ENGLKIDIHVIIPYEGLSGDQMGQIEKIFKVVYPVDD                                                      |
| N116    | MAHHHHHHVGTGSNDDDDKSPDPNWELMVFTLEDFVGDWRQTAGYNLDQVLEQGGVSSLFQNLGVSVTPIQRIVLSG<br>ENGLKIDIHVIIPYEGLSGDQMGQIEKIFKVVYPVDDHHFKVILHYGTLVIDGVTPNMIDYFRPY                          |
| N137    | MAHHHHHHVGTGSNDDDDKSPDPNWELMVFTLEDFVGDWRQTAGYNLDQVLEQGGVSSLFQNLGVSVTPIQRIVLSG<br>ENGLKIDIHVIIPYEGLSGDQMGQIEKIFKVVYPVDDHHFKVILHYGTLVIDGVTPNMIDYFRPYEGIAVFDGKKITVTGTL<br>WNGN |
| 66C     | MGGLSGDQMGQIEKIFKVVYPVDDHHFKVILHYGTLVIDGVTPNMIDYFRPYEGIAVFDGKKITVTGTLWNGNKIIDERLI<br>NPDGSLLFRVTINGVTGWRLCERILALQGSELHHHHHH                                                 |
| 77C     | MGKIFKVVYPVDDHHFKVILHYGTLVIDGVTPNMIDYFRPYEGIAVFDGKKITVTGTLWNGNKIIDERLINPDGSLLFRVTI<br>NGVTGWRLCERILALQGSELHHHHHH                                                            |
| 88C     | MGHHFKVILHYGTLVIDGVTPNMIDYFRPYEGIAVFDGKKITVTGTLWNGNKIIDERLINPDGSLLFRVTINGVTGWRLCE<br>RILALQGSELHHHHHH                                                                       |
| 117C    | MGEGIAVFDGKKITVTGTLWNGNKIIDERLINPDGSLLFRVTINGVTGWRLCERILALQGSELHHHHHH                                                                                                       |
| 138C    | MGKIIDERLINPDGSLLFRVTINGVTGWRLCERILALQGSELHHHHHH                                                                                                                            |

**Table S2: Amino Acid Sequences for N65 Fusion Constructs Used in Bacterial Experiments**

| Protein                                                       | Amino acid sequence                                                                                                                                                                                                                                                                                                                                                                                                                                                                                     |
|---------------------------------------------------------------|---------------------------------------------------------------------------------------------------------------------------------------------------------------------------------------------------------------------------------------------------------------------------------------------------------------------------------------------------------------------------------------------------------------------------------------------------------------------------------------------------------|
| <b>GFP-N65</b>                                                | MAHHHHHHVGTGSNDDDDKSPDPMASMSKGEELFTGVVPIVLVDGDVNGHKFSVSGEGEGDATYGKLT<br>LKFICTTGKLPVPWPTLVTTLYGVQCFSRYPDHMKQHDFFKSAMPEGYVQERTIFFKDDGNYKTRAEVKFE<br>GDTLVNRIELKGIDFKEDGNILGHKLEYNNSHNHYIMADKQKNGIKVNFKIRHNIEDGSQLADHYQQNTPIG<br>DGPVLLPDNHLYSTQSALSKDPNEKRDHMLLEFVTAAGITLGMDELYKEISYASRGGGSSGGGELMVFTLE<br>DFVGDWRQTAGYNLDQVLEQGGVSSLFQNLGVSVTPIQRIVLSENGLKIDIHVIIPYE                                                                                                                                    |
| <b>MBP-N65</b>                                                | MAHHHHHHVGTGSNDDDDKSPDPMKIEEGKLVWINGDKGYNGLAEVGGKFEKDTGKVTVEHPDKLEEKF<br>PQVAATGDGPDIIFFWAHDRFGGYAQSGLLAEITPKAFQDKLYPFTWDAVRYNGKLIAYPIAVEALSLIYNKDL<br>LPNPPKTWEEIPALDKELKAKGKSALMFNLQEPYFTWPLIAADGGYAFKYENGYDIKDVGDNAGAKAGLT<br>FLVDLIKKNKHMNADTDYSIAEAAFNKGETAMTINGPWAWNSNIDTSKVNYGVTVLPTFKGQPSKPFVGVLSAGI<br>NAASPNKELAKEFLENYLLTDEGLEAVNKDKPLGAVALKSYEEELVKDPRIATMENAQKGEIMPNIQMSAF<br>WYAVRTAVINAASGRQTVDEALKDAQTNARGGGSSGGGELMVFTLEDFVGDWRQTAGYNLDQVLEQGGV<br>SSLFQNLGVSVTPIQRIVLSENGLKIDIHVIIPYE |
| <b>A<math>\beta</math><sub>1-42</sub>-N65</b>                 | MAHHHHHHVGTGSNDDDDKSPDPAEFRHDSGYEVHHQKLVFFAEDVGSNKGAIIGLMVGGVVAEISYAS<br>RGGGSSGGGELMVFTLEDFVGDWRQTAGYNLDQVLEQGGVSSLFQNLGVSVTPIQRIVLSENGLKIDIHVI<br>PYE                                                                                                                                                                                                                                                                                                                                                 |
| <b>A<math>\beta</math><sub>1-42</sub>GM18-N65<sup>a</sup></b> | MAHHHHHHVGTGSNDDDDKSPDPAEFRHDSGYEVHHQKLVFFAEDVGSNKGAIIG <b>PM</b> VGGVVAEISYAS<br>RGGGSSGGGELMVFTLEDFVGDWRQTAGYNLDQVLEQGGVSSLFQNLGVSVTPIQRIVLSENGLKIDIHVI<br>PYE                                                                                                                                                                                                                                                                                                                                        |
| <b>A<math>\beta</math><sub>1-42</sub>GM33-N65<sup>a</sup></b> | MAHHHHHHVGTGSNDDDDKSPDPAEFRHDSGYEVHHQKLVFFAEDVGSNKGAIIG <b>PM</b> VGGVVAEISYAS<br>RGGGSSGGGELMVFTLEDFVGDWRQTAGYNLDQVLEQGGVSSLFQNLGVSVTPIQRIVLSENGLKIDIHVI<br>PYE                                                                                                                                                                                                                                                                                                                                        |
| <b>A<math>\beta</math><sub>1-42</sub>GM6-N65<sup>a</sup></b>  | MAHHHHHHVGTGSNDDDDKSPDPAEFRHDSGYEVHHQKLV <b>S</b> FAEDVGSNKGAIIG <b>PM</b> VGGVVAEISYAS<br>RGGGSSGGGELMVFTLEDFVGDWRQTAGYNLDQVLEQGGVSSLFQNLGVSVTPIQRIVLSENGLKIDIHVI<br>PYE                                                                                                                                                                                                                                                                                                                               |
| <b>A<math>\beta</math><sub>1-42</sub>D23N-N65</b>             | MAHHHHHHVGTGSNDDDDKSPDPAEFRHDSGYEVHHQKLVFFA <b>N</b> VGSNKGAIIGLMVGGVVAEISYAS<br>RGGGSSGGGELMVFTLEDFVGDWRQTAGYNLDQVLEQGGVSSLFQNLGVSVTPIQRIVLSENGLKIDIHVI<br>PYE                                                                                                                                                                                                                                                                                                                                         |
| <b>A<math>\beta</math><sub>1-42</sub>E22G-N65</b>             | MAHHHHHHVGTGSNDDDDKSPDPAEFRHDSGYEVHHQKLVFFA <b>G</b> DVGSNKGAIIGLMVGGVVAEISYAS<br>RGGGSSGGGELMVFTLEDFVGDWRQTAGYNLDQVLEQGGVSSLFQNLGVSVTPIQRIVLSENGLKIDIHVI<br>PYE                                                                                                                                                                                                                                                                                                                                        |

<sup>a</sup>Point mutations are highlighted in red.

**Table S3: Amino Acid Sequences for Fusion Proteins Used in Mammalian Cell Experiments**

| Protein                                                         | Amino acid sequence                                                                                                                                                                                                                                                                                                                                                                                          |
|-----------------------------------------------------------------|--------------------------------------------------------------------------------------------------------------------------------------------------------------------------------------------------------------------------------------------------------------------------------------------------------------------------------------------------------------------------------------------------------------|
| <b>N65<sup>a</sup></b>                                          | MVSKGEELFTGVVPILVELDGDVNGHKFSVSGEGEGDATYGKLTCLKICTTGKLPVPWPTLVTTLLGYGLQCF<br>ARYPDHMKQHDFFKSAMPEGYVQERTIFFKDDGNYKTRAEVKFEGDTLVNRIELKGIDFKEDGNILGHKLEY<br>NYNSHNVIYITADKQKNGIKANFKIRHNIEDGGVQLADHYQQNTPIGDGPVLLPDNHLYSYQSKLSKDPNEKR<br>DHMVLLLEFVTAAGITLGMDELYKSGLRSAVDGTAGPGSAYASRGGGSSGGGELMVFTLEDFVGDWRQTAG<br>YNLDQVLEQGGVSSLFQNLGVSVTPIQRIVLSGENGLKIDIHVIIPYE                                            |
| <b>A<math>\beta</math><sub>1-42</sub>-N65<sup>a</sup></b>       | MVSKGEELFTGVVPILVELDGDVNGHKFSVSGEGEGDATYGKLTCLKICTTGKLPVPWPTLVTTLLGYGLQCF<br>ARYPDHMKQHDFFKSAMPEGYVQERTIFFKDDGNYKTRAEVKFEGDTLVNRIELKGIDFKEDGNILGHKLEY<br>NYNSHNVIYITADKQKNGIKANFKIRHNIEDGGVQLADHYQQNTPIGDGPVLLPDNHLYSYQSKLSKDPNEKR<br>DHMVLLLEFVTAAGITLGMDELYKSGLRSAQAWDAEFRHDSGYEVHHQKLVFFAEDVGSNKGAIIGLMVGG<br>VVAEISYASRGGGSSGGGELMVFTLEDFVGDWRQTAGYNLDQVLEQGGVSSLFQNLGVSVTPIQRIVLSGE<br>NGLKIDIHVIIPYE   |
| <b>A<math>\beta</math><sub>1-42</sub>GM18-N65<sup>a,b</sup></b> | MVSKGEELFTGVVPILVELDGDVNGHKFSVSGEGEGDATYGKLTCLKICTTGKLPVPWPTLVTTLLGYGLQCF<br>ARYPDHMKQHDFFKSAMPEGYVQERTIFFKDDGNYKTRAEVKFEGDTLVNRIELKGIDFKEDGNILGHKLEY<br>NYNSHNVIYITADKQKNGIKANFKIRHNIEDGGVQLADHYQQNTPIGDGPVLLPDNHLYSYQSKLSKDPNEKR<br>DHMVLLLEFVTAAGITLGMDELYKSGLRSAQAWDAEFRHDSGYEVHHQKLVFFAEDVGSNKGAIIGLMVGG<br>VVAEISYASRGGGSSGGGELMVFTLEDFVGDWRQTAGYNLDQVLEQGGVSSLFQNLGVSVTPIQRIVLSGE<br>NGLKIDIHVIIPYE   |
| <b>A<math>\beta</math><sub>1-42</sub>GM6-N65<sup>a,b</sup></b>  | MVSKGEELFTGVVPILVELDGDVNGHKFSVSGEGEGDATYGKLTCLKICTTGKLPVPWPTLVTTLLGYGLQCF<br>ARYPDHMKQHDFFKSAMPEGYVQERTIFFKDDGNYKTRAEVKFEGDTLVNRIELKGIDFKEDGNILGHKLEY<br>NYNSHNVIYITADKQKNGIKANFKIRHNIEDGGVQLADHYQQNTPIGDGPVLLPDNHLYSYQSKLSKDPNEKR<br>DHMVLLLEFVTAAGITLGMDELYKSGLRSAQAWDAEFRHDSGYEVHHQKLVFFAEDVGSNKGAIIGLMVGG<br>VVAEISYASRGGGSSGGGELMVFTLEDFVGDWRQTAGYNLDQVLEQGGVSSLFQNLGVSVTPIQRIVLSGE<br>NGLKIDIHVIIPYE   |
| <b>66C<sup>a</sup></b>                                          | MGGLSGDQMGQIEKIFKVVYPVDDHFFKVLHYGTLVIDGVTNPMIDYFGRPYEGIAVFDGKKITVTGTLWNG<br>NKIIDERLINPDGSLFRVTINGVTGWRLCERILALQGGGSSGGGKLRILQSTVPRARDPPVATMVSKGEELFT<br>GVVPILVELDGDVNGHKFSVSGEGEGDATYGKLTCLKICTTGKLPVPWPTLVTTLLTWGVQCFARYPDHMKQ<br>HDFFKSAMPEGYVQERTIFFKDDGNYKTRAEVKFEGDTLVNRIELKGIDFKEDGNILGHKLEYNAISDNVIYTA<br>DKQKNGIKANFKIRHNIEDGVSQVLADHYQQNTPIGDGPVLLPDNHLYSTQSKLSKDPNEKRDMVLLLEFVTA<br>AGITLGMDELYK |

<sup>a</sup>An added fluorescent protein tag is highlighted in blue. <sup>b</sup>Point mutations are highlighted in red.



## 10. References

- (1) Hall, M. P., Unch, J., Binkowski, B. F., Valley, M. P., Butler, B. L., Wood, M. G., Otto, P., Zimmerman, K., Vidugiris, G., Machleidt, T., Robers, M. B., Benink, H. A., Eggers, C. T., Slater, M. R., Meisenheimer, P. L., Klaubert, D. H., Fan, F., Encell, L. P., and Wood, K. V. (2012) Engineered luciferase reporter from a deep sea shrimp utilizing a novel imidazopyrazinone substrate. *ACS Chem. Biol.* 7, 1848-1857.
- (2) Kyte, J., and Doolittle, R. F. (1982) A Simple Method for Displaying the Hydrophobic Character of a Protein. *J. Mol. Biol.* 157, 105-132.
- (3) Jones, D. T. (1999) Protein secondary structure prediction based on position-specific scoring matrices. *J. Mol. Biol.* 292, 195-202.
- (4) Wurth, C., Guimard, N. K., and Hecht, M. H. (2002) Mutations that reduce aggregation of the Alzheimer's Aβ<sub>42</sub> peptide: an unbiased search for the sequence determinants of Aβ<sub>42</sub> amyloidogenesis. *J. Mol. Biol.* 319, 1279-1290.
